# Supplementary material
Source: PubMed Central journal article supplement (PMC5953426)
Supplement: NIHMS965071-supplement-Supplemental_Table.pdf [file NIHMS965071-supplement-Supplemental_Table.pdf]

## SUPPLEMENTARY MATERIALS

Table 1. Rotated component pattern for spouse and family/friend Partner Responses to Cancer Inventory scale (original version)

| Items                                                                                                    | Spouse                                      |                                             | Family/friend                               |                                             |
|----------------------------------------------------------------------------------------------------------|---------------------------------------------|---------------------------------------------|---------------------------------------------|---------------------------------------------|
|                                                                                                          | Factor 1<br>Rotated<br>Component<br>Loading | Factor 2<br>Rotated<br>Component<br>Loading | Factor 1<br>Rotated<br>Component<br>Loading | Factor 2<br>Rotated<br>Component<br>Loading |
| Eigenvalue                                                                                               | 4.11                                        | 10.32                                       | 8.25                                        | 2.24                                        |
| % Variance explained                                                                                     | 13.3%                                       | 33.3%                                       | 26.6%                                       | 19.4%                                       |
| How often during the past month did your (spouse/friends or family members)...                           |                                             |                                             |                                             |                                             |
| 27. Say things that made your situation clearer and easier to understand?                                | <b>0.79</b>                                 | -0.09                                       | <b>0.78</b>                                 | 0.02                                        |
| 14. Encourage you to stand your ground and fight for what you wanted (e.g., pursue a medical treatment)? | <b>0.75</b>                                 | 0.13                                        | <b>0.69</b>                                 | 0.10                                        |
| 20. Encourage you to make a plan of action and follow it?                                                | <b>0.75</b>                                 | -0.01                                       | <b>0.78</b>                                 | 0.18                                        |
| 24. Help come up with a solution to a problem you encountered?                                           | <b>0.71</b>                                 | -0.09                                       | <b>0.78</b>                                 | -0.11                                       |
| 17. Help you analyze a problem you were having in order to understand it better?                         | <b>0.71</b>                                 | -0.16                                       | <b>0.81</b>                                 | -0.06                                       |

Table 1 Continued

| Items                                                                                                                                                               | Spouse                                      |                                             | Family/friend                               |                                             |
|---------------------------------------------------------------------------------------------------------------------------------------------------------------------|---------------------------------------------|---------------------------------------------|---------------------------------------------|---------------------------------------------|
|                                                                                                                                                                     | Factor 1<br>Rotated<br>Component<br>Loading | Factor 2<br>Rotated<br>Component<br>Loading | Factor 1<br>Rotated<br>Component<br>Loading | Factor 2<br>Rotated<br>Component<br>Loading |
| 11. Encourage you to talk to someone (e.g. another physician, lupus/vasculitis agency) to find out more about the problems you were encountering with your illness? | <b>0.70</b>                                 | 0.03                                        | <b>0.72</b>                                 | 0.22                                        |
| 3. Suggest some action you should take?                                                                                                                             | <b>0.66</b>                                 | 0.30                                        | <b>0.74</b>                                 | 0.14                                        |
| 18. Provide you with transportation?                                                                                                                                | <b>0.63</b>                                 | 0.07                                        | <b>0.72</b>                                 | 0.10                                        |
| 7. Encourage you to talk to other family and friends about how you were feeling?                                                                                    | <b>0.60</b>                                 | -0.12                                       | <b>0.77</b>                                 | 0.07                                        |
| 25. Do household chores or errands you found difficult to do?                                                                                                       | <b>0.58</b>                                 | -0.15                                       | <b>0.69</b>                                 | -0.10                                       |
| 15. Handle or clear up money matters (e.g., insurance, monthly bills)?                                                                                              | <b>0.52</b>                                 | 0.08                                        | <b>0.40</b>                                 | 0.09                                        |
| 9. Ask you how you were feeling?                                                                                                                                    | <b>0.48</b>                                 | -0.27                                       | <b>0.46</b>                                 | -0.20                                       |
| 1. Joke and try to cheer you up?                                                                                                                                    | <b>0.48</b>                                 | -0.15                                       | <b>0.64</b>                                 | -0.14                                       |

Table 1 Continued

| Items                                                                                            | Spouse                                      |                                             | Family/friend                               |                                             |
|--------------------------------------------------------------------------------------------------|---------------------------------------------|---------------------------------------------|---------------------------------------------|---------------------------------------------|
|                                                                                                  | Factor 1<br>Rotated<br>Component<br>Loading | Factor 2<br>Rotated<br>Component<br>Loading | Factor 1<br>Rotated<br>Component<br>Loading | Factor 2<br>Rotated<br>Component<br>Loading |
| 29. Check to see if you followed advice she/he gave you?*                                        | <b>0.66</b>                                 | 0.25                                        | 0.60                                        | 0.36                                        |
| 22. Pitch in and do something that needed to be done?*                                           | 0.38                                        | -0.41                                       | <b>0.75</b>                                 | -0.10                                       |
| 5. Let you know she/he would always be around if you needed assistance?*                         | 0.40                                        | -0.41                                       | <b>0.65</b>                                 | -0.21                                       |
| 12. Comfort you by showing some physical affection?*                                             | 0.50                                        | -0.44                                       | <b>0.63</b>                                 | -0.36                                       |
| 6. Seem angry or upset with you when she/he did things to help you?                              | 0.15                                        | <b>0.86</b>                                 | 0.09                                        | <b>0.55</b>                                 |
| 16. Avoid being around you when you were not feeling well?                                       | -0.02                                       | <b>0.77</b>                                 | 0.08                                        | <b>0.64</b>                                 |
| 28. Complain about your illness or about helping with a task you found difficult to do yourself? | 0.11                                        | <b>0.76</b>                                 | -0.09                                       | <b>0.71</b>                                 |
| 2. Seem impatient with you?                                                                      | 0.13                                        | <b>0.76</b>                                 | 0.03                                        | <b>0.59</b>                                 |
| 26. Seem to not respect your feelings?                                                           | 0.02                                        | <b>0.76</b>                                 | 0.01                                        | <b>0.63</b>                                 |

Table 1 continued

| Items                                                                                          | Spouse                                      |                                             | Family/friend                               |                                             |
|------------------------------------------------------------------------------------------------|---------------------------------------------|---------------------------------------------|---------------------------------------------|---------------------------------------------|
|                                                                                                | Factor 1<br>Rotated<br>Component<br>Loading | Factor 2<br>Rotated<br>Component<br>Loading | Factor 1<br>Rotated<br>Component<br>Loading | Factor 2<br>Rotated<br>Component<br>Loading |
| 19. Give you the idea she/he really did not want to talk about the problem you were having?    | -0.08                                       | <b>0.72</b>                                 | 0.06                                        | <b>0.77</b>                                 |
| 23. Shout or yell at you?                                                                      | 0.01                                        | <b>0.67</b>                                 | 0.01                                        | <b>0.47</b>                                 |
| 13. Have you wait a long time for help when you needed it?                                     | 0.00                                        | <b>0.66</b>                                 | -0.06                                       | <b>0.74</b>                                 |
| 4. Criticize the way you handled your illness and/or its treatment?                            | .019                                        | <b>0.66</b>                                 | 0.11                                        | <b>0.52</b>                                 |
| 31. Encourage you to keep your feelings to yourself?                                           | -0.03                                       | <b>0.64</b>                                 | -0.12                                       | <b>0.93</b>                                 |
| 10. Seem to not enjoy being around you?                                                        | -0.04                                       | <b>0.58</b>                                 | -0.10                                       | <b>0.59</b>                                 |
| 8. Seem less accepting of you since you got lupus/vasculitis?                                  | -0.14                                       | <b>0.56</b>                                 | -0.16                                       | <b>0.70</b>                                 |
| 30. Seem uncomfortable talking to you about your illness?                                      | -0.05                                       | <b>0.56</b>                                 | 0.13                                        | <b>0.58</b>                                 |
| 21. Act if he/she was not emotionally supportive of you, when you were expecting some support? | -0.19                                       | <b>0.46</b>                                 | -0.07                                       | <b>0.58</b>                                 |

\*Items that were discarded based on high component cross-loadings.

Table 2. Factor analysis with Promax rotation for reduced versions of spouse and family/friend PRCI scale

| Items                                                                                                    | Spouse                                        |                                             | Family/friend                               |                                             |
|----------------------------------------------------------------------------------------------------------|-----------------------------------------------|---------------------------------------------|---------------------------------------------|---------------------------------------------|
|                                                                                                          | Factor 1 †<br>Rotated<br>Component<br>Loading | Factor 2<br>Rotated<br>Component<br>Loading | Factor 1<br>Rotated<br>Component<br>Loading | Factor 2<br>Rotated<br>Component<br>Loading |
| Eigenvalue                                                                                               | 4.97                                          | 8.84                                        | 6.60                                        | 5.75                                        |
| % Variance explained                                                                                     | 14.3%                                         | 32.7%                                       | 24.4%                                       | 21.3%                                       |
| How often during the past month did your (spouse/friends or family members)...                           |                                               |                                             |                                             |                                             |
| 27. Say things that made your situation clearer and easier to understand?                                | <b>0.81</b>                                   | -0.08                                       | <b>0.79</b>                                 | -0.02                                       |
| 14. Encourage you to stand your ground and fight for what you wanted (e.g., pursue a medical treatment)? | <b>0.75</b>                                   | 0.13                                        | <b>0.72</b>                                 | 0.06                                        |
| 24. Help come up with a solution to a problem you encountered?                                           | <b>0.74</b>                                   | -0.07                                       | <b>0.78</b>                                 | -0.13                                       |
| 17. Help you analyze a problem you were having in order to understand it better?                         | <b>0.74</b>                                   | -0.15                                       | <b>0.83</b>                                 | -0.10                                       |
| 20. Encourage you to make a plan of action and follow it?                                                | <b>0.73</b>                                   | -0.03                                       | <b>0.78</b>                                 | 0.14                                        |

Table 2 Continued

| Items                                                                                                                                                               | Spouse                                      |                                             | Family/friend                               |                                             |
|---------------------------------------------------------------------------------------------------------------------------------------------------------------------|---------------------------------------------|---------------------------------------------|---------------------------------------------|---------------------------------------------|
|                                                                                                                                                                     | Factor 1<br>Rotated<br>Component<br>Loading | Factor 2<br>Rotated<br>Component<br>Loading | Factor 1<br>Rotated<br>Component<br>Loading | Factor 2<br>Rotated<br>Component<br>Loading |
| 11. Encourage you to talk to someone (e.g. another physician, lupus/vasculitis agency) to find out more about the problems you were encountering with your illness? | <b>0.71</b>                                 | 0.04                                        | <b>0.73</b>                                 | 0.19                                        |
| 3. Suggest some action you should take?                                                                                                                             | <b>0.68</b>                                 | 0.28                                        | <b>0.75</b>                                 | 0.11                                        |
| 18. Provide you with transportation?                                                                                                                                | <b>0.64</b>                                 | 0.09                                        | <b>0.71</b>                                 | 0.08                                        |
| 7. Encourage you to talk to other family and friends about how you were feeling?                                                                                    | <b>0.60</b>                                 | -0.12                                       | <b>0.77</b>                                 | 0.04                                        |
| 25. Do household chores or errands you found difficult to do?                                                                                                       | <b>0.58</b>                                 | -0.12                                       | <b>0.67</b>                                 | -0.11                                       |
| 15. Handle or clear up money matters (e.g., insurance, monthly bills)?                                                                                              | <b>0.51</b>                                 | 0.06                                        | <b>0.42</b>                                 | 0.07                                        |
| 9. Ask you how you were feeling?                                                                                                                                    | <b>0.50</b>                                 | -0.26                                       | <b>0.44</b>                                 | -0.20                                       |
| 1. Joke and try to cheer you up?                                                                                                                                    | <b>0.48</b>                                 | -0.12                                       | <b>0.64</b>                                 | -0.16                                       |

Table 2 Continued

| Items                                                                                            | Spouse                                      |                                             | Family/friend                               |                                             |
|--------------------------------------------------------------------------------------------------|---------------------------------------------|---------------------------------------------|---------------------------------------------|---------------------------------------------|
|                                                                                                  | Factor 1<br>Rotated<br>Component<br>Loading | Factor 2<br>Rotated<br>Component<br>Loading | Factor 1<br>Rotated<br>Component<br>Loading | Factor 2<br>Rotated<br>Component<br>Loading |
| 6. Seem angry or upset with you when she/he did things to help you?                              | 0.13                                        | <b>0.86</b>                                 | 0.08                                        | <b>0.56</b>                                 |
| 16. Avoid being around you when you were not feeling well?                                       | -0.04                                       | <b>0.77</b>                                 | 0.10                                        | <b>0.63</b>                                 |
| 2. Seem impatient with you?                                                                      | 0.11                                        | <b>0.77</b>                                 | 0.03                                        | <b>0.59</b>                                 |
| 28. Complain about your illness or about helping with a task you found difficult to do yourself? | 0.07                                        | <b>0.75</b>                                 | -0.10                                       | <b>0.72</b>                                 |
| 26. Seem to not respect your feelings?                                                           | 0.02                                        | <b>0.74</b>                                 | -0.01                                       | <b>0.63</b>                                 |
| 19. Give you the idea she/he really did not want to talk about the problem you were having?      | -0.12                                       | <b>0.72</b>                                 | 0.07                                        | <b>0.77</b>                                 |
| 13. Have you wait a long time for help when you needed it?                                       | 0.01                                        | <b>0.67</b>                                 | -0.04                                       | <b>0.73</b>                                 |
| 23. Shout or yell at you?                                                                        | .004                                        | <b>0.66</b>                                 | -0.01                                       | <b>0.49</b>                                 |
| 4. Criticize the way you handled your illness and/or its treatment?                              | .017                                        | <b>0.65</b>                                 | 0.12                                        | <b>0.51</b>                                 |

Table 2 Continued

| Items                                                                                          | Spouse                                      |                                             | Family/friend                               |                                             |
|------------------------------------------------------------------------------------------------|---------------------------------------------|---------------------------------------------|---------------------------------------------|---------------------------------------------|
|                                                                                                | Factor 1<br>Rotated<br>Component<br>Loading | Factor 2<br>Rotated<br>Component<br>Loading | Factor 1<br>Rotated<br>Component<br>Loading | Factor 2<br>Rotated<br>Component<br>Loading |
| 31. Encourage you to keep your feelings to yourself?                                           | -0.05                                       | <b>0.64</b>                                 | -0.13                                       | <b>0.65</b>                                 |
| 10. Seem to not enjoy being around you?                                                        | -0.04                                       | <b>0.58</b>                                 | -0.11                                       | <b>0.60</b>                                 |
| 8. Seem less accepting of you since you got lupus/vasculitis?                                  | -0.15                                       | <b>0.57</b>                                 | -0.16                                       | <b>0.71</b>                                 |
| 30. Seem uncomfortable talking to you about your illness?                                      | -0.09                                       | <b>0.56</b>                                 | 0.13                                        | <b>0.58</b>                                 |
| 21. Act if he/she was not emotionally supportive of you, when you were expecting some support? | -0.23                                       | <b>0.45</b>                                 | -0.07                                       | <b>0.57</b>                                 |

† Factor 1 was the second factor to emerge, but it has been labeled Factor 1 for the sake of consistency with Table 1.
